# Supplementary material for: Systematic survey reveals general applicability of "guilt-by-association" within gene coexpression networks
Source: Springer Nature journal article supplement (doi:10.1186/1471-2105-6-227), 2005-09-14

Descendent to parent diagnostics

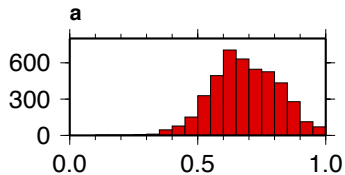

Sibling diagnostics

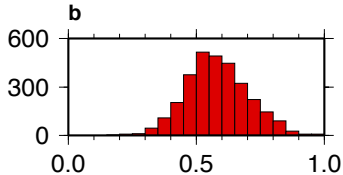

Distances of 3-16

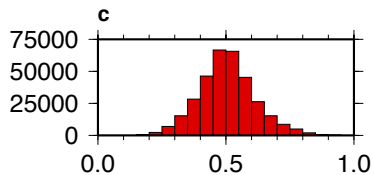

Distances of 3-16 (randomized)

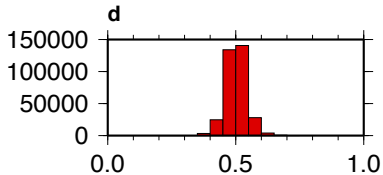

Immune response

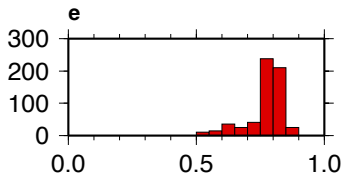

Cell cycle

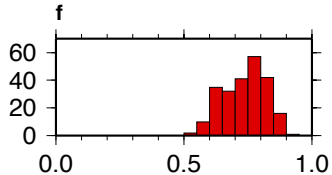

Supplement: 12859_2005_552_MOESM6_ESM.pdf [file 12859_2005_552_MOESM6_ESM.pdf]
