# Supplementary material for: Systematic survey reveals general applicability of "guilt-by-association" within gene coexpression networks
Source: Springer Nature journal article supplement (doi:10.1186/1471-2105-6-227), 2005-09-14

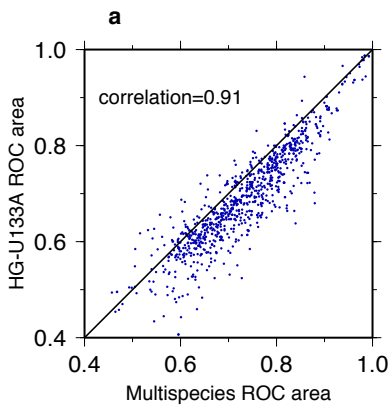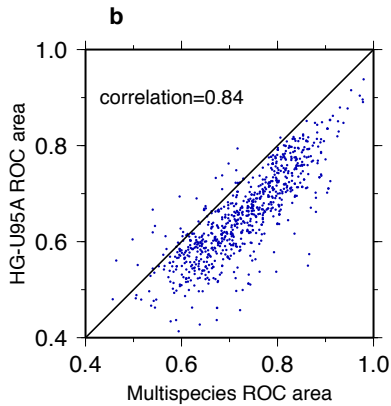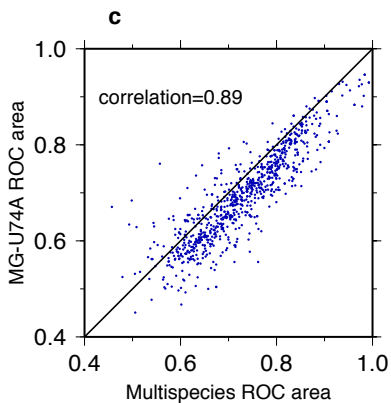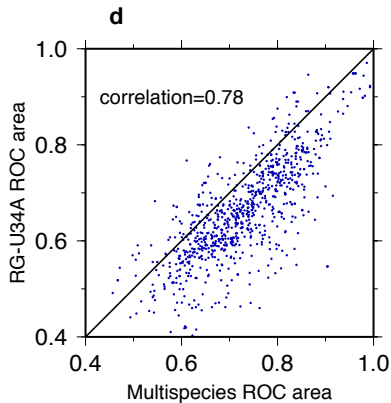

Supplement: 12859_2005_552_MOESM7_ESM.pdf [file 12859_2005_552_MOESM7_ESM.pdf]
